# Supplementary material for: Internalization and Transport of PEGylated Lipid-Based Mixed Micelles across Caco-2 Cells Mediated by Scavenger Receptor B1
Source: Pharmaceutics. 2021 Nov 26;13(12):2022. doi: 10.3390/pharmaceutics13122022 (PMC8703698; doi:10.3390/pharmaceutics13122022)
Supplement: Supplementary file 1 [file pharmaceutics-13-02022-s001.zip › pharmaceutics-1452617-supplementary for conversion.pdf]

Supplementary Materials

# Internalization and Transport of PEGylated Lipid-Based Mixed Micelles Across Caco-2 Cells Mediated by Scavenger Receptor B1

Xiangjie Su <sup>1</sup>, Mercedes Ramírez-Escudero <sup>2</sup>, Feilong Sun <sup>1</sup>, Joep B. van den Dikkenberg <sup>1</sup>, Mies J. van Steenberg <sup>1</sup>, Roland J. Pieters <sup>3</sup>, Bert J. C. Janssen <sup>2</sup>, Peter M. van Hasselt <sup>4</sup>, Wim E. Hennink <sup>1</sup> and Cornelus F. van Nostrum <sup>1,\*</sup>

<sup>1</sup> Department of Pharmaceutics, Utrecht Institute for Pharmaceutical Sciences, Utrecht University, 3584 CG Utrecht, The Netherlands; x.su1@uu.nl (X.S.); [dragonfly88214@hotmail.com](mailto:dragonfly88214@hotmail.com) (F.S.); j.b.vandendikkenberg@uu.nl (J.B.v.d.D.); m.j.vansteenbergen@uu.nl (M.J.v.S.); w.e.hennink@uu.nl (W.E.H.)

<sup>2</sup> Structural Biochemistry, Bijvoet Center for Biomolecular Research, Faculty of Science, Utrecht University, 3584 CG Utrecht, The Netherlands. mramirezescudero@gmail.com (M.R.E.); b.j.c.janssen@uu.nl (B.J.C.J.)

<sup>3</sup> Department of Chemical Biology & Drug Discovery, Utrecht Institute for Pharmaceutical Sciences, Utrecht University, 3584 CG Utrecht, The Netherlands; R.J.Pieters@uu.nl

<sup>4</sup> Department of Pediatrics, Wilhelmina Children's Hospital, University Medical Center Utrecht, 3584 EA Utrecht, The Netherlands; P.vanhasselt@umcutrecht.nl

\* Correspondence: C.F.vanNostrum@uu.nl; Tel.: +31-620274607

Z-average size

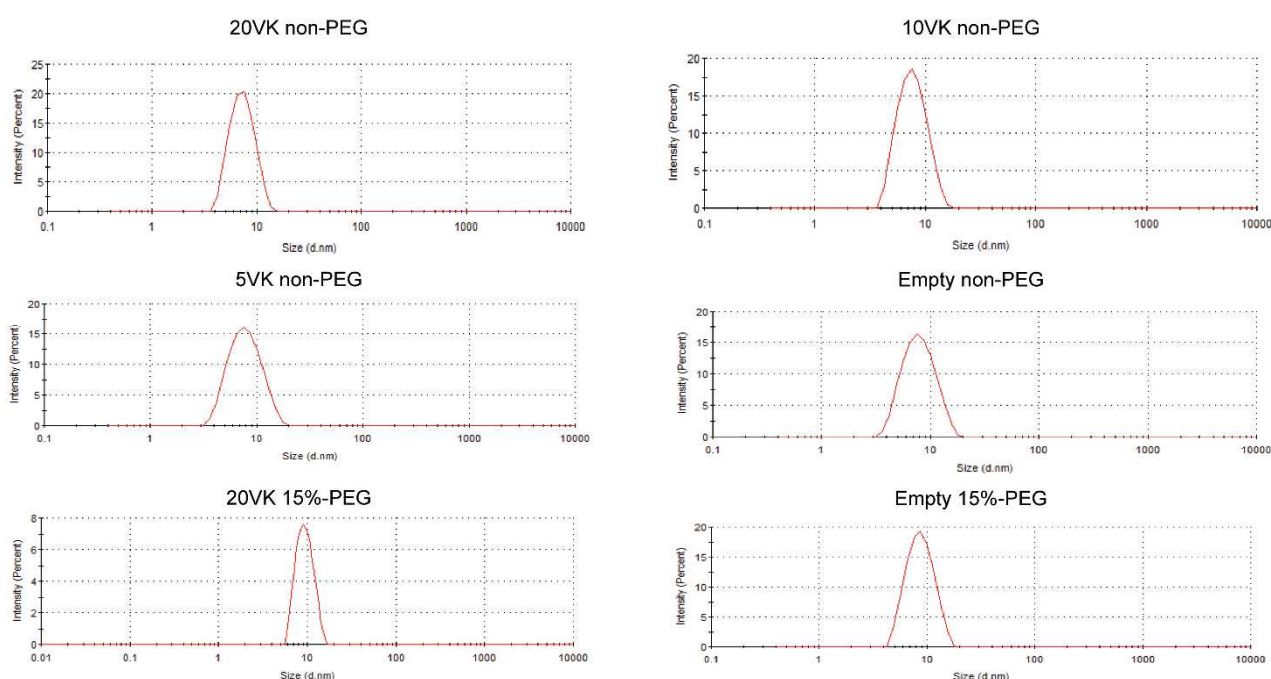

20VK 30%-PEG

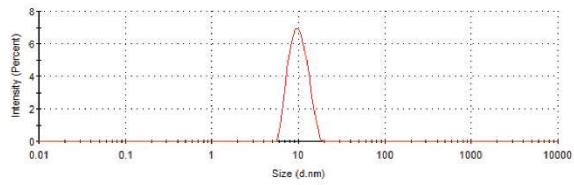

Blank 30%-PEG

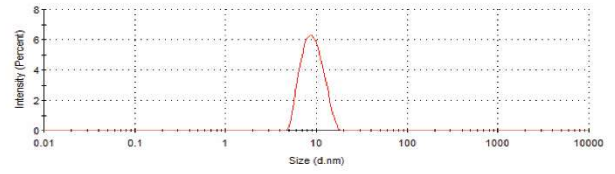

20VK 50%-PEG

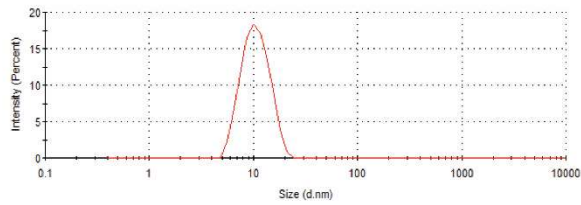

Empty 50%-PEG

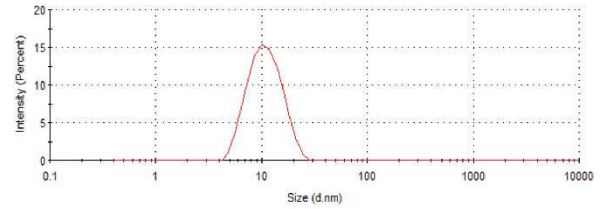

DSPE-PEG

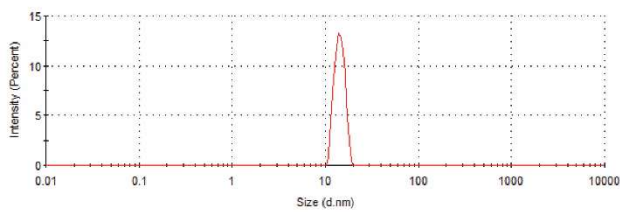

## Zeta potential

20VK non-PEG

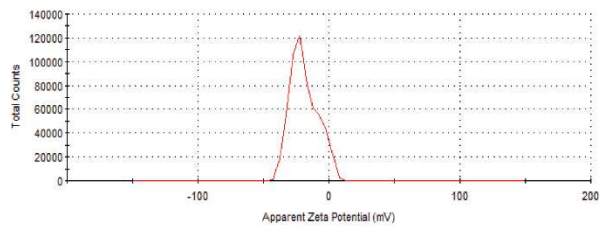

10VK non-PEG

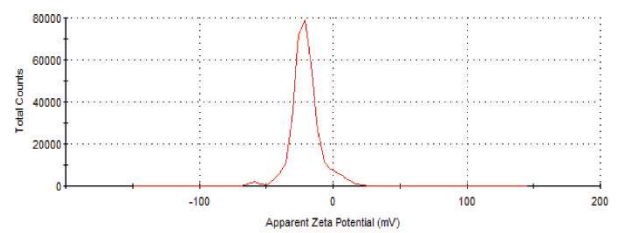

5VK non-PEG

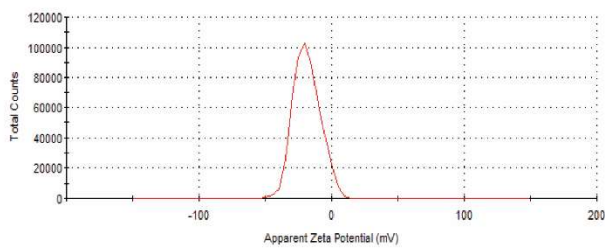

Empty non-PEG

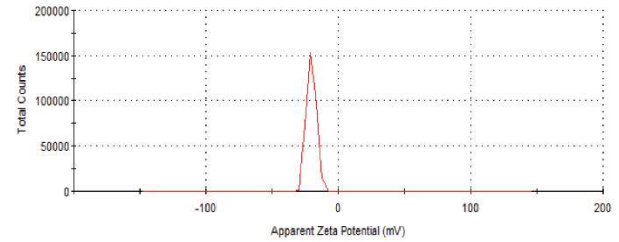

20VK 15%-PEG

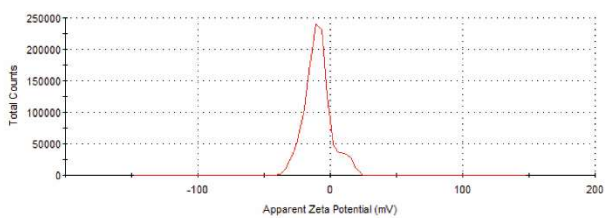

Empty 15%-PEG

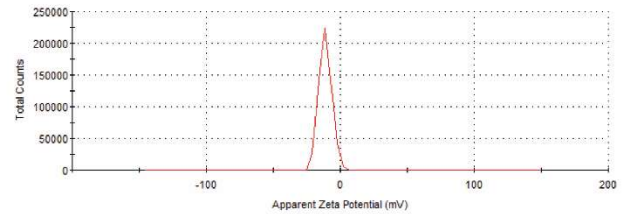

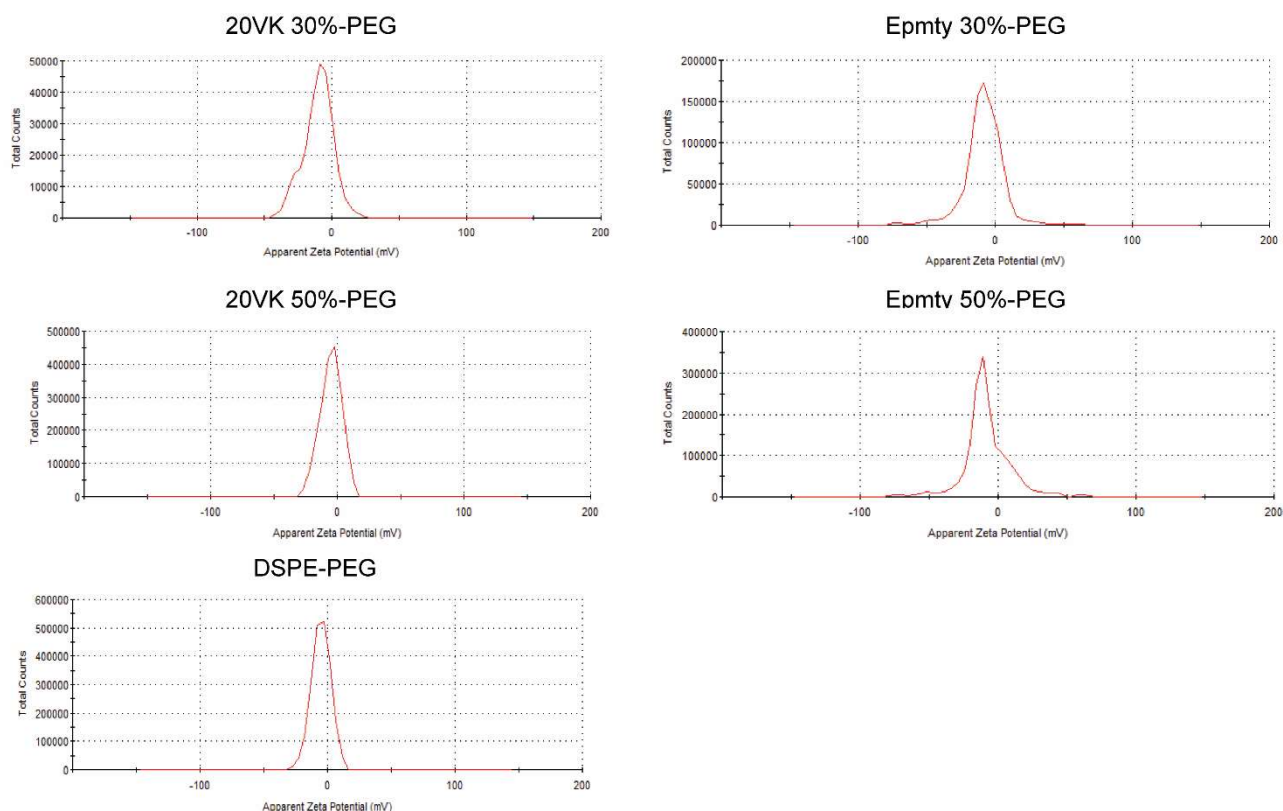

**Figure S1.** Representative Z-average size and zeta potential of mixed micelles with varying vitamin K loading and PEG content

**Table S1.** Calculated distance between neighboring chains ( $D$ ) and  $R_f/D$  of micellar PEG layer

| Formulations  | Radius of Micelle* (nm) | wt% PEG | $D$ (nm) | $R_f/D$ |
|---------------|-------------------------|---------|----------|---------|
| 20VK-15%-PEG  | 4.55                    | 17.5%   | 2.61     | 1.32    |
| Empty 15%-PEG | 4.20                    | 18.5%   | 2.86     | 1.20    |
| 20VK-30%-PEG  | 4.85                    | 29.7%   | 1.94     | 1.78    |
| Empty 30%-PEG | 4.35                    | 31.2%   | 2.09     | 1.65    |
| 20VK-50%-PEG  | 5.35                    | 41.2%   | 1.33     | 2.58    |
| Empty 50%-PEG | 5.25                    | 42.9%   | 1.34     | 2.56    |
| DSPE-PEG      | 7.05                    | 71.3%   | 0.67     | 5.13    |

\* Radius of micelle as determined by DLS,  $R_f = 3.44$ .

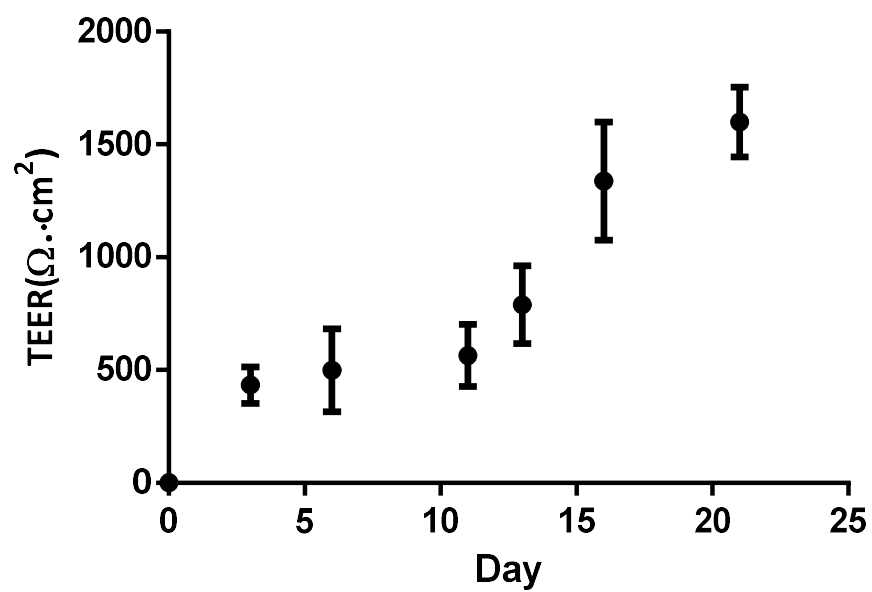

**Figure S2.** Trans-epithelial electric resistance (TEER) values (mean  $\pm$  SD from 24 wells) of Caco-2 monolayers on transwell inserts as a function of the culture time.

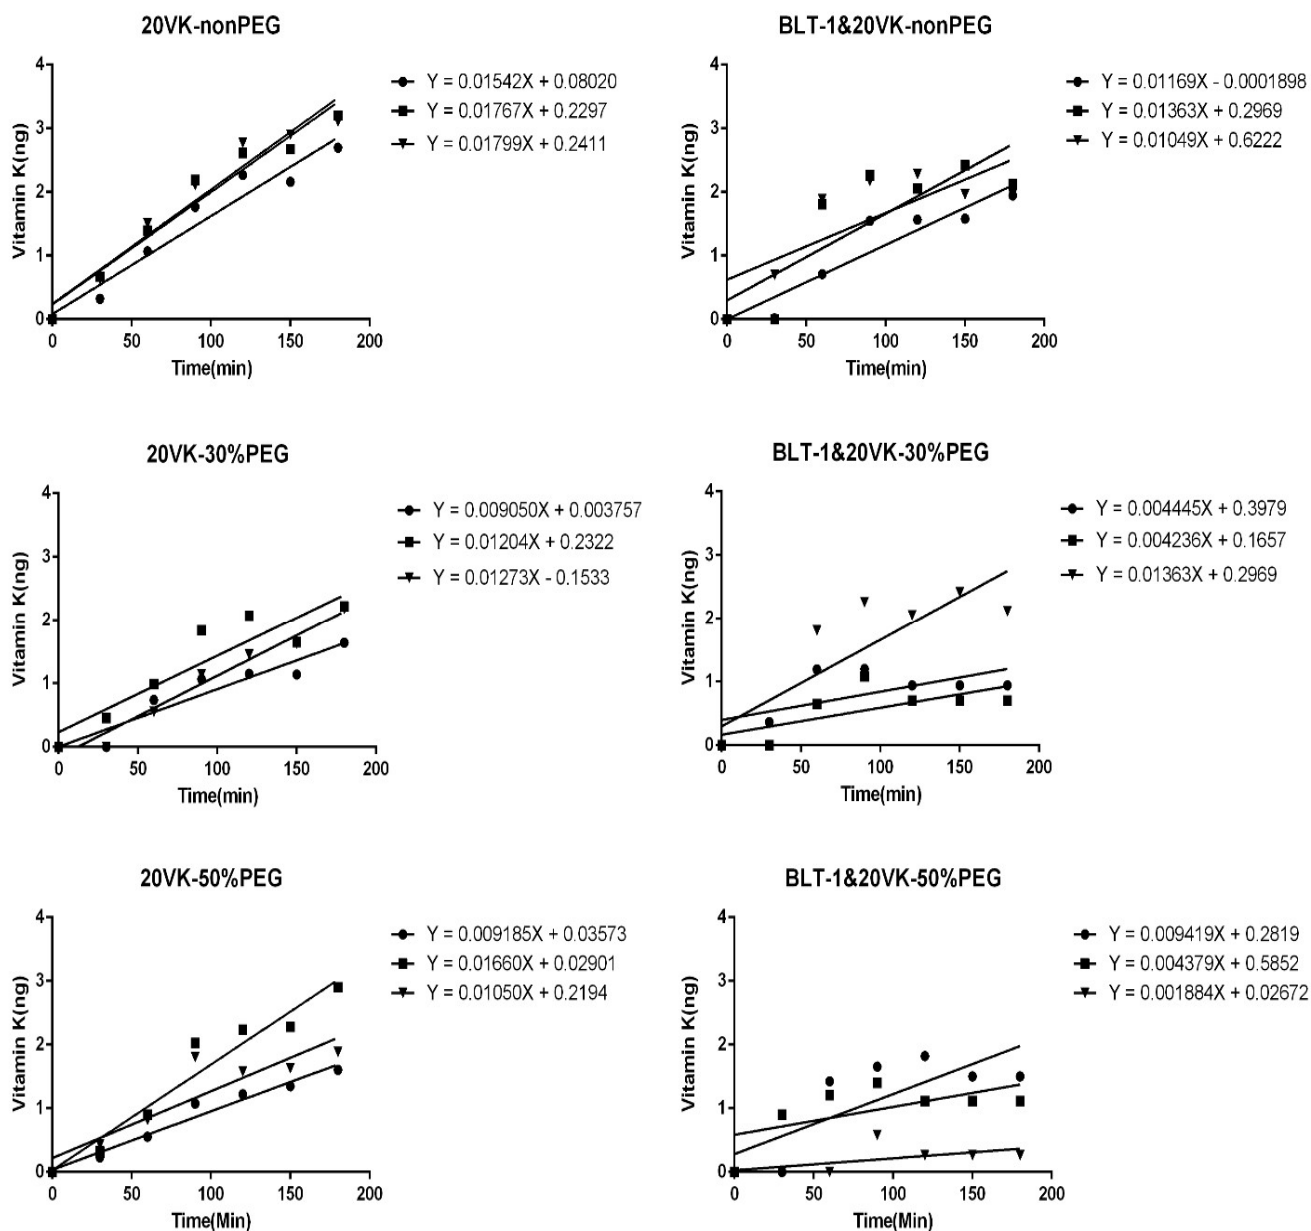

**Figure S3.** Cumulative amounts of transported vitamin K across Caco-2 monolayers. From top to bottom: non-PEGylated micelles, 30%-PEGylated micelles and 50%-PEGylated micelles; without (left) and with 10  $\mu$ M BLT-1 inhibitor (right) (triplicates for each group).

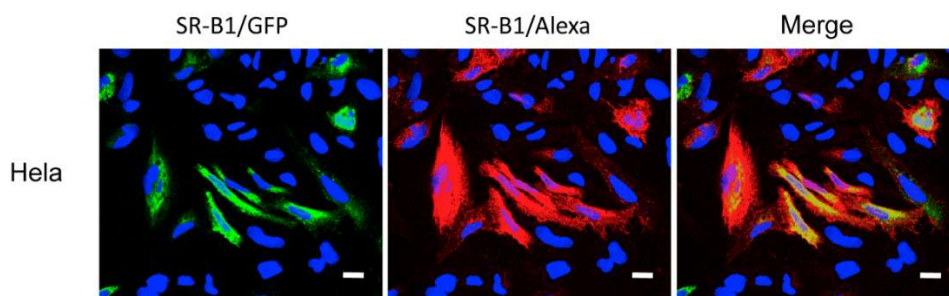

**Figure S4.** Fluorescence of the SR-B1/GFP fusion protein and immunofluorescence staining of SR-B1/Alexa in transfected HELA cells (the scale bar is 20  $\mu$ m).

A

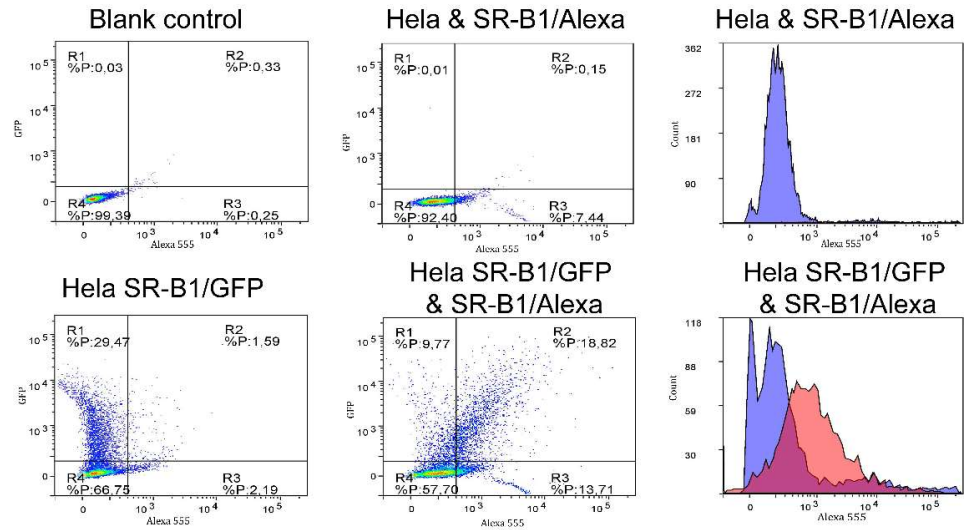

B 2 h incubation @ 4°C

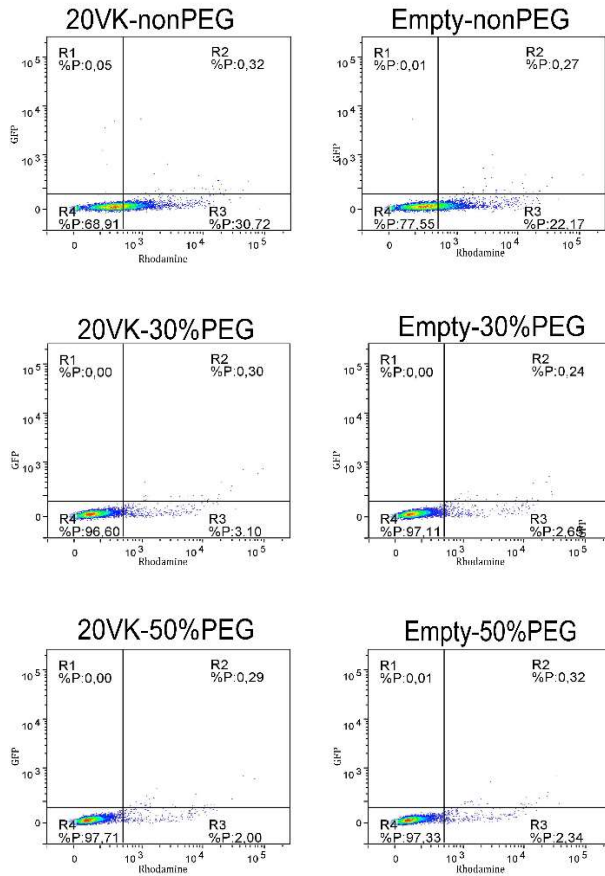

C 2 h incubation @ 37 °C

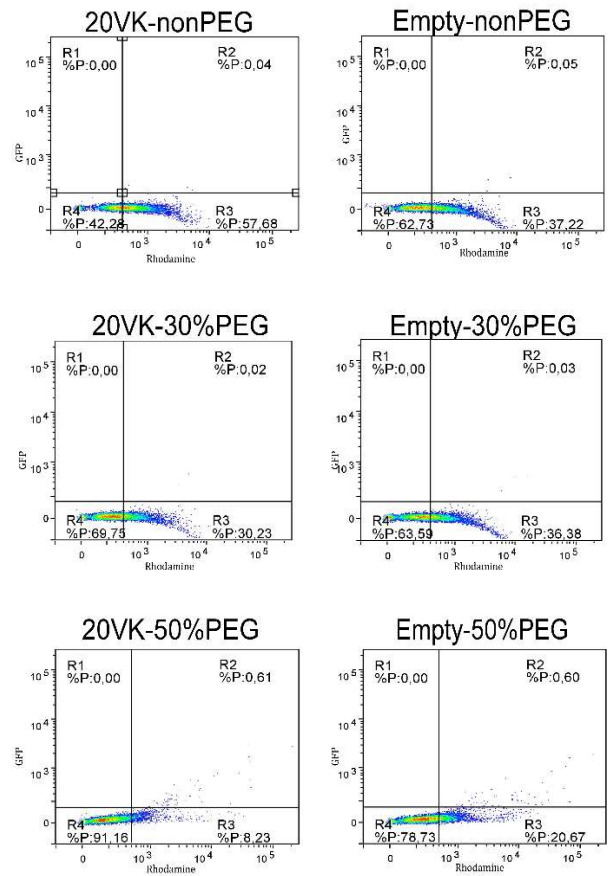

D

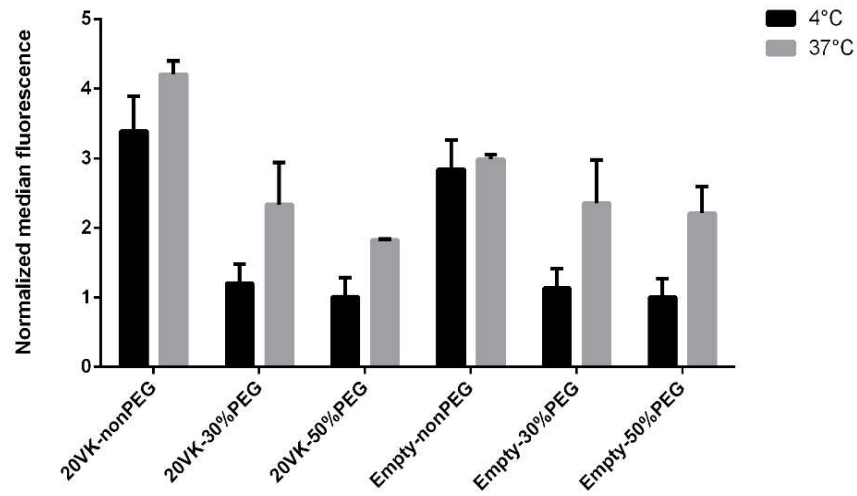

**Figure S5.** (A) FACS analysis of HeLa cells showing SR-B1/GFP fluorescence (Y-axis) and/or SR-B1 expression as determined by immunofluorescence staining (X-axis) (Top: native HeLa cells, Bottom: transfected HeLa cells). GFP/SR-B1 fluorescence (Y-axis) and rhodamine fluorescence (X-axis) upon incubation at 4 °C (B) and at 37 °C (C) with native HeLa cells of, from top to bottom: non-PEGylated, 30%-PEGylated and 50%-PEGylated mixed micelles (1.58 mM lipid) labeled with rhodamine without (empty) or loaded with vitamin K (350  $\mu$ M). (D) Quantification of corresponding fluorescence of rhodamine for native HeLa cells incubated with micellar formulations, shown as mean  $\pm$  SD. The quantified fluorescence intensity was normalized by the intensity observed for cells incubated with 20VK-50%PEG micelles.

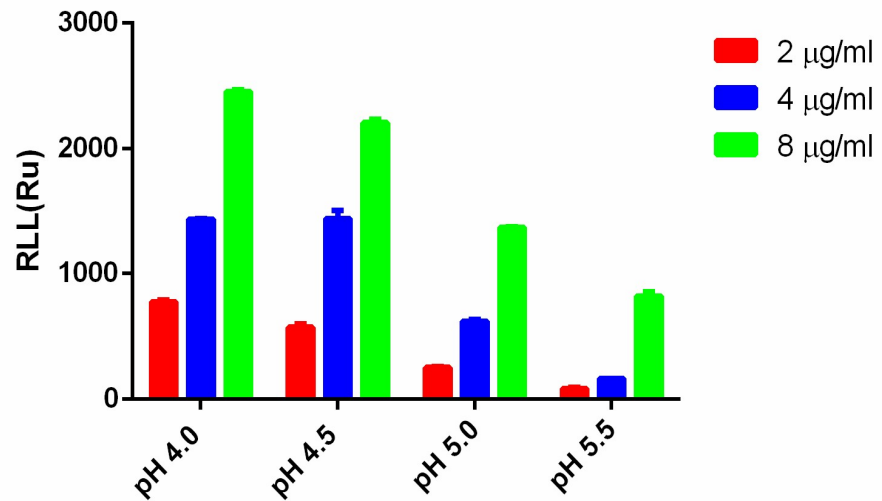

**Figure S6.** RLL (response of local ligand) values of SR-B1 spots immobilized on the chip using different SR-B1 solutions in PBS (2, 4 and 8  $\mu$ g/mL) at four different pHs (4.0, 4.5, 5.0, 5.5).

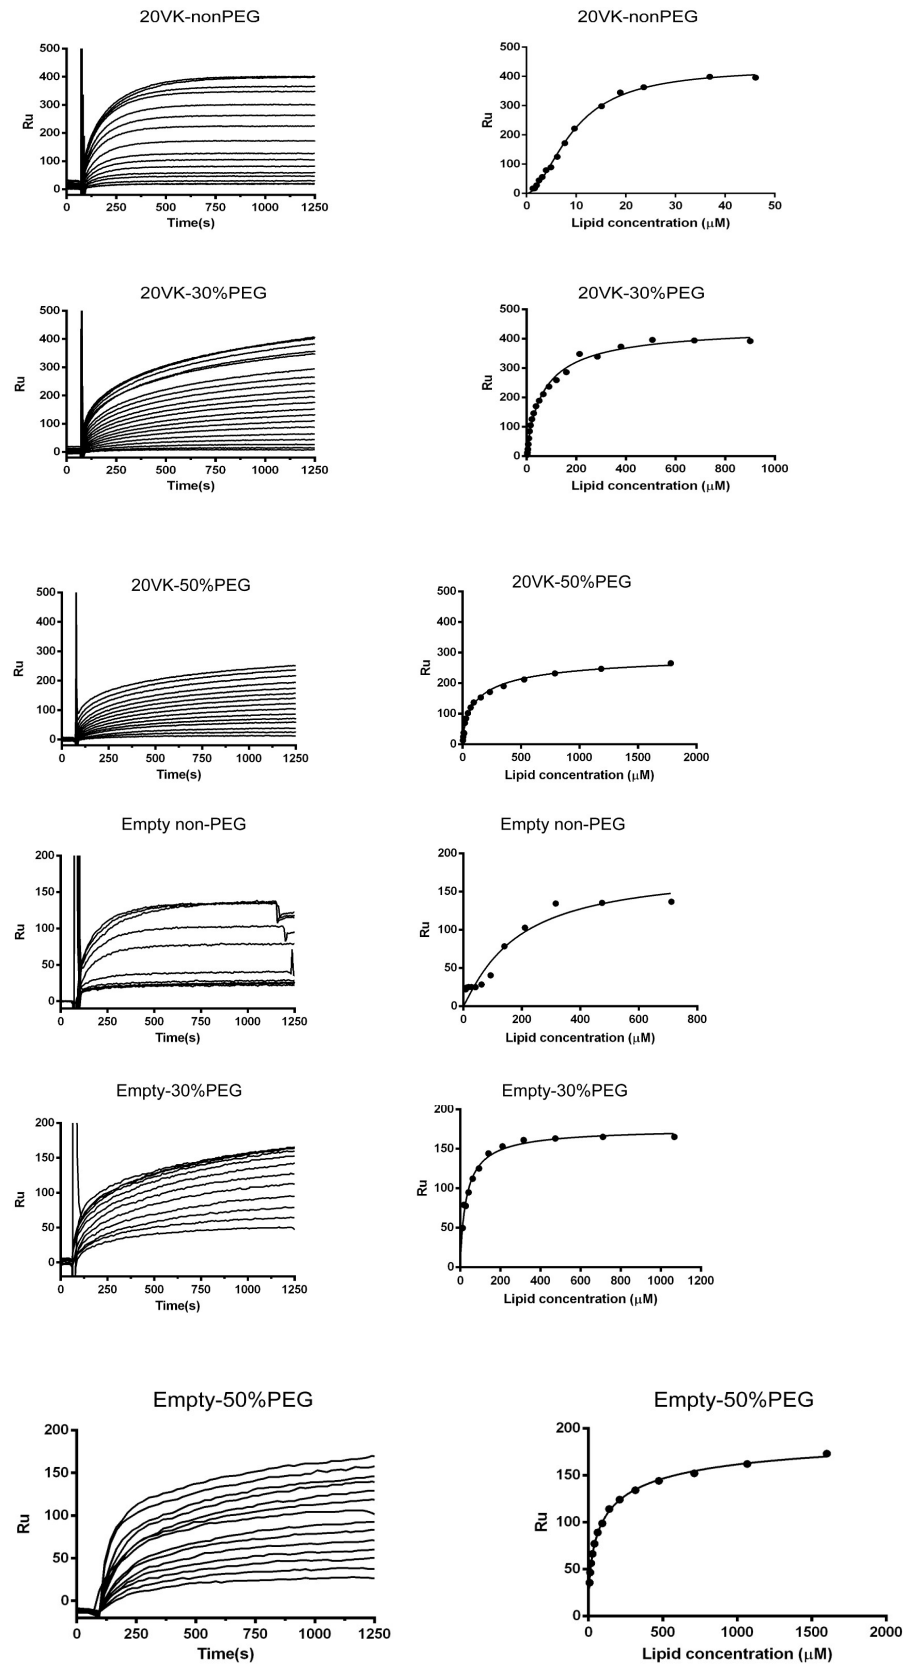

**Figure S7.** The representative binding responses of serial dilutions of mixed micelles ( non-PEG, 30%-PEG and 50%-PEG without (empty) and with 20 mg vitamin K) interacting with SR-B1 immobilized on the SPR chip (left) and fitting of SPR data to one site specific model (right). The response was recorded at spots with RLL  $2452 \pm 16$ .

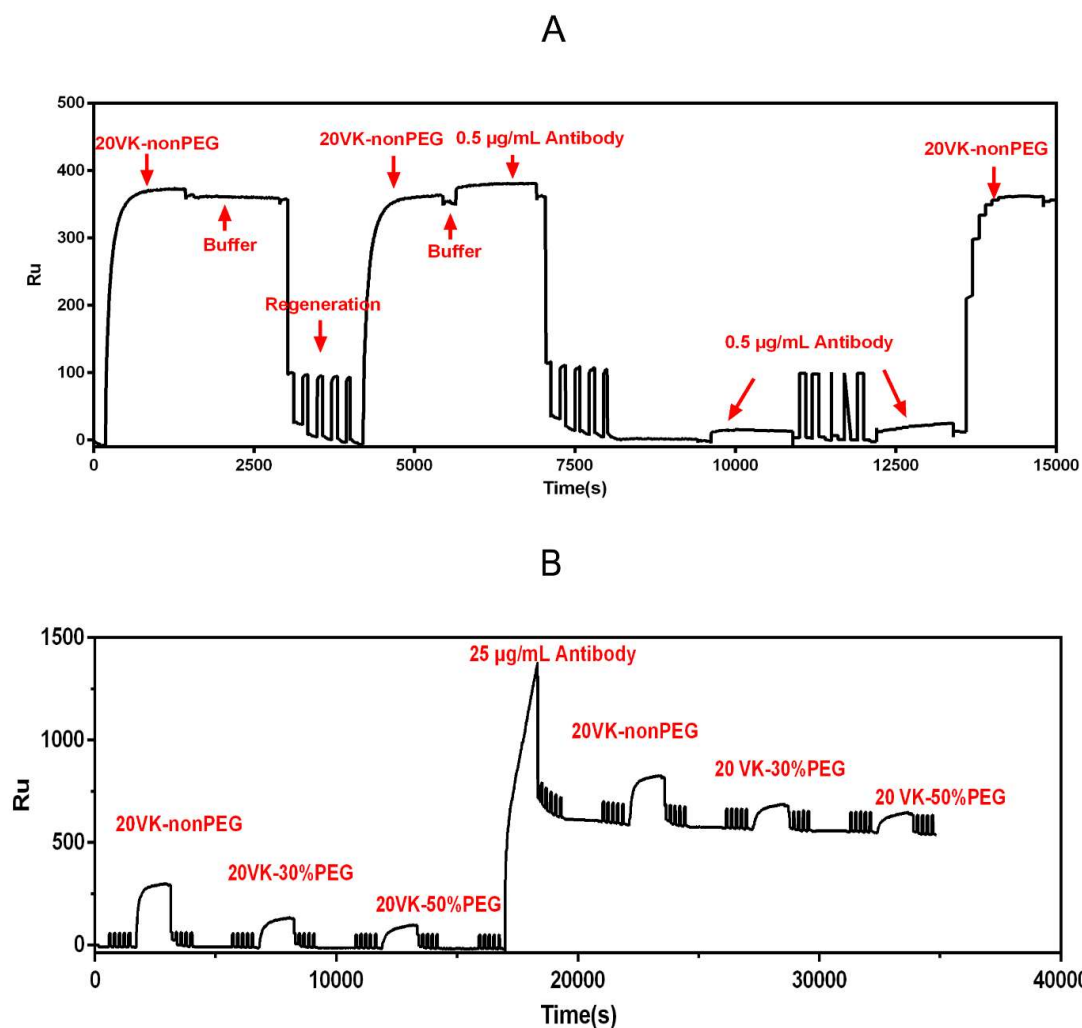

**Figure S8.** Competition between vitamin K loaded mixed micelles and a matching antibody for their interaction with the SR-B1. **(A)** Subsequent injections of 20VK-nonPEG formulations (8  $\mu$ M vitamin K, 36  $\mu$ M lipid) and 0.5  $\mu$ g/mL antibody: antibody was first exposed to the occupied receptor (after second injection of the micelles), then twice to the regenerated receptor, after which the micelles were injected again. **(B)** SPR response of micelles with different degrees of PEGylation (20VK-nonPEG, 20VK-30PEG, 20VK-50PEG, with 8  $\mu$ M vitamin K and 36  $\mu$ M lipid) before and after the SR-B1 was blocked by 25 $\mu$ g/mL antibody.
